# Supplementary material for: Template-Based Modeling of Protein-RNA Interactions
Source: PubMed Central journal article supplement (PMC5035060; doi:10.1371/journal.pcbi.1005120), 2016-09-23
Supplement: pcbi.1005120.s006.pdf [file pcbi.1005120.s006.pdf]

## S2 Table. Number of successfully docked benchmark complexes

| Conformational change (Å) | 0 - 2 | 2 - 4 | 4 - 6 | 6 - 8 | 8 - 10 | 10 - 13 |
|---------------------------|-------|-------|-------|-------|--------|---------|
| Number of complexes       | 14    | 13    | 9     | 4     | 2      | 4       |
| PRIME                     | 9     | 9     | 5     | 1     | 1      | 0       |
| RPDock & DECK-RP          | 6     | 4     | 1     | 2     | 0      | 0       |

Conformational change is max RMSD between bound and unbound structure of RNA or protein  
Complex is successfully docked if at least one hit with ligand RMSD <10 Å is in top 100
